# Supplementary material for: Prediction of Fuel Properties of Torrefied Biomass Based on Back Propagation Neural Network Hybridized with Genetic Algorithm Optimization
Source: MDPI journal article supplement (doi:10.3390/en16031483), 2023-02-02

## Supplementary Materials

# Prediction of fuel properties of torrefied biomass based on back propagation neural network optimized by genetic algorithm

Liu Xiaorui <sup>1</sup>, Yang Haiping <sup>2,\*</sup>, Yang Jiamin <sup>1</sup>, Liu Fang <sup>3</sup>

<sup>1</sup> School of Mine, China University of Mining and Technology, 221116 Xuzhou, China; liuxiaorui214@163.com;

<sup>2</sup> State Key Laboratory of Coal Combustion, School of Energy and Power Engineering, Huazhong University of Science and Technology, Wuhan 430074, People's Republic of China; yhp2002@163.com;

<sup>3</sup> School of Low-Carbon Energy and Power Engineering, China University of Mining and Technology, 221116 Xuzhou, China;

\* Correspondence: yhp2002@163.com;

Table.S1. Dataset.

| Biomass                                         | Torrefaction condition                 | Ref. |
|-------------------------------------------------|----------------------------------------|------|
| olive residue, almond shell                     | N <sub>2</sub> , 275 °C, 60 min        | [1]  |
| olive tree                                      | He, 220~280 °C, 60~360 min             | [2]  |
| rice husk                                       | Ar, 220~270 °C, 30~60 min              | [3]  |
| coffee grounds                                  | N <sub>2</sub> , 200~300 °C, 30 min    | [4]  |
| banana leaf waste                               | N <sub>2</sub> , 220~280 °C, 1 min     | [5]  |
| rice straw, rice husk                           | N <sub>2</sub> , 200~300 °C, 30 min    | [6]  |
| pearl millet, walnut shell                      | N <sub>2</sub> , 230~300 °C, 30~90 min | [7]  |
| ash tree, hazelnut shell, refuse-derived fuel   | N <sub>2</sub> , 230~290 °C, 30 min    | [8]  |
| garden waste                                    | Ar, 200~300 °C, 30~60 min              | [9]  |
| mixture of municipal organic wastes and biomass | N <sub>2</sub> , 200~275 °C, 30 min    | [10] |
| empty fruit bunches                             | N <sub>2</sub> , 225~300 °C, 40 min    | [11] |
| oil palm empty fruit bunch                      | N <sub>2</sub> , 250~300 °C, 30 min    | [12] |
| caragana                                        | N <sub>2</sub> , 225~275 °C, 10~20 min | [13] |
| pellet consists of 80% larch and 20% oak        | anoxic, 200~270 °C, 20~40 min          | [14] |
| rice straw, bamboo dust                         | N <sub>2</sub> , 250 °C, 15 min        | [15] |
| pine sawdust                                    | N <sub>2</sub> , 260~300, 11 min       | [16] |
| ananas comosus peel, annona squamosa peel       | N <sub>2</sub> , 210~300 °C, 30~60 min | [17] |
| eucalyptus grandis                              | N <sub>2</sub> , 230~290 °C, 60 min    | [18] |
| leucaena leucocephala                           | N <sub>2</sub> , 260~300 °C, 0~30 min  | [19] |

| Biomass                                                         | Torrefaction condition                  | Ref. |
|-----------------------------------------------------------------|-----------------------------------------|------|
| moso bamboo                                                     | N <sub>2</sub> , 200~300 °C, 60~120 min | [20] |
| rice husk, rice straw                                           | N <sub>2</sub> , 200~300 °C             | [21] |
| pongamia seed pods                                              | N <sub>2</sub> , 200~300 °C, 60 min     | [22] |
| rubberwood                                                      | N <sub>2</sub> , 200~300 °C, 20~60 min  | [23] |
| cellulose                                                       | N <sub>2</sub> , 200~290 °C, 30 min     | [24] |
| fruit waste                                                     | N <sub>2</sub> , 210~300 °C, 30~60 min  | [25] |
| empty fruit bunches                                             | N <sub>2</sub> , 225~300 °C, 20~60 min  | [26] |
| mustard crop residue                                            | N <sub>2</sub> , 200~300 °C, 30~60 min  | [27] |
| pine, kenaf                                                     | N <sub>2</sub> , 250 °C, 30 min         | [28] |
| prosopis juliflora                                              | N <sub>2</sub> , 230~270 °C, 30 min     | [29] |
| sugarcane bagasse                                               | N <sub>2</sub> , 230~280 °C, 30~45 min  | [30] |
| orange peel                                                     | N <sub>2</sub> , 220~280 °C, 30 min     | [31] |
| rice husk, rice straw                                           | N <sub>2</sub> , 200~300 °C, 60 min     | [32] |
| poplar wood                                                     | N <sub>2</sub> , 200~300 °C, 60 min     | [33] |
| olive kernel                                                    | N <sub>2</sub> , 300 °C, 60 min         | [34] |
| rice husk                                                       | oxygen-deficient, 240~280 °C, 0~90 min  | [35] |
| miscanthus, hops waste                                          | oxygen-deficient, 250 °C, 60 min        | [36] |
| waste vine shoots                                               | N <sub>2</sub> , 220~280 °C, 10~60 min  | [37] |
| almond shells, olive stones                                     | N <sub>2</sub> , 250~300 °C, 45 min     | [38] |
| sugarcane leaves                                                | N <sub>2</sub> , 225~300 °C, 30 min     | [39] |
| corncob                                                         | N <sub>2</sub> , 210~300 °C, 30 min     | [40] |
| bamboo forest residues                                          | N <sub>2</sub> , 200~300 °C, 60 min     | [41] |
| leftover rice, leftover cabbage, leftover pork, watermelon peel | Ar, 200~300 °C, 30 min                  | [42] |
| wooden block                                                    | N <sub>2</sub> , 220~280 °C, 40 min     | [43] |
| sugarcane bagasse                                               | N <sub>2</sub> , 200~275 °C, 60 min     | [44] |
| sorghum straw                                                   | N <sub>2</sub> , 230~300 °C, 30~108 min | [45] |
| pigeon pea stalk, eucalyptus                                    | N <sub>2</sub> , 200~300 °C, 30 min     | [46] |
| sorghum straw                                                   | N <sub>2</sub> , 230~300 °C, 10 min     | [47] |
| rice straw                                                      | N <sub>2</sub> , 200~250 °C, 45 min     | [48] |
| pine wood, rice husk                                            | N <sub>2</sub> , 210~300 °C, 30 min     | [49] |
| rice husk                                                       | N <sub>2</sub> , 220~300 °C, 30 min     | [50] |
| mixture of waste wood, oak waste wood and sewage sludge         | oxygen-deficient, 220~300 °C, 120 min   | [51] |
| corncob, rice husk                                              | N <sub>2</sub> , 200~300 °C, 30~60 min  | [52] |
| ponkan peel waste                                               | N <sub>2</sub> , 200~300 °C, 15~60 min  | [53] |
| black alder                                                     | N <sub>2</sub> , 250~300 °C, 30~60 min  | [54] |
| Norway spruce                                                   | N <sub>2</sub> , 225~275 °C, 30~60 min  | [55] |
| sugarcane bagasse                                               | N <sub>2</sub> , 200~300 °C, 15~60 min  | [56] |
| pigeon pea stalk                                                | N <sub>2</sub> , 225~275 °C, 15~45 min  | [57] |
| rice husk                                                       | N <sub>2</sub> , 210~300 °C, 30 min     | [58] |
| wood biomass                                                    | Ar, 230~290 °C, 60 min                  | [59] |
| pine wood                                                       | N <sub>2</sub> , 250~290 °C, 30~60 min  | [60] |

| Biomass                                                       | Torrefaction condition                 | Ref. |
|---------------------------------------------------------------|----------------------------------------|------|
| vine pruning, olive tree pruning, corn stalk, poultry litters | N <sub>2</sub> , 300 °C, 30 min        | [61] |
| rice straw, cotton stalk                                      | N <sub>2</sub> , 210~290 °C, 20~60 min | [62] |
| cotton stalk, corn stalk                                      | N <sub>2</sub> , 200~290 °C, 30 min    | [63] |
| oil palm fiber, Eucalyptus                                    | N <sub>2</sub> , 250~300 °C, 60 min    | [64] |
| willow, reed canary grass, wheat straw                        | N <sub>2</sub> , 230~290 °C, 30 min    | [65] |
| rice straw                                                    | N <sub>2</sub> , 200~300 °C, 60 min    | [66] |

## References:

1. Gürel, K.; Magalhães, D.; Kazanç, F., The effect of torrefaction, slow, and fast pyrolysis on the single particle combustion of agricultural biomass and lignite coal at high heating rates. *Fuel* **2022**, 308, 122054.
2. González-Arias, J.; Gómez, X.; González-Castaño, M.; Sánchez, M.E.; Rosas, J.G.; Cara-Jiménez, J., Insights into the product quality and energy requirements for solid biofuel production: A comparison of hydrothermal carbonization, pyrolysis and torrefaction of olive tree pruning. *Energy* **2022**, 238, 122022.
3. Zhang, L.; Wang, Z.; Ma, J.; Kong, W.; Yuan, P.; Sun, R.; Shen, B., Analysis of functionality distribution and microstructural characteristics of upgraded rice husk after undergoing non-oxidative and oxidative torrefaction. *Fuel* **2022**, 310, 122477.
4. Fu, J.; Liu, J.; Xu, W.; Chen, Z.; Evrendilek, F.; Sun, S., Torrefaction, temperature, and heating rate dependencies of pyrolysis of coffee grounds: Its performances, bio-oils, and emissions. *Bioresource Technol* **2022**, 345, 126346.
5. Alves, J.L.F.; Da Silva, J.C.G.; Sellin, N.; Prá, F.D.B.; Sapelini, C.; Souza, O.; Marangoni, C., Upgrading of banana leaf waste to produce solid biofuel by torrefaction: physicochemical properties, combustion behaviors, and potential emissions. *Environ Sci Pollut R* **2022**, 29, (17), 25733-25747.
6. Chen, C.; Yang, R.; Wang, X.; Qu, B.; Zhang, M.; Ji, G.; Li, A., Effect of in-situ torrefaction and densification on the properties of pellets from rice husk and rice straw. *Chemosphere* **2022**, 289, 133009.
7. Abdullah, I.; Ahmad, N.; Hussain, M.; Ahmed, A.; Ahmed, U.; Park, Y., Conversion of biomass blends (walnut shell and pearl millet) for the production of solid biofuel via torrefaction under different conditions. *Chemosphere* **2022**, 295, 133894.
8. Haykiri-Acma, H.; Yaman, S., Effects of torrefaction after pelleting (TAP) process on strength and fuel characteristics of binderless bio-pellets. *Biomass Convers Bior* **2022**.
9. Grycova, B.; Klemencova, K.; Jezerska, L.; Zidek, M.; Lestinsky, P., Effect of torrefaction on pellet quality parameters. *Biomass Convers Bior* **2022**.
10. Ma, J.; Zhang, Z.; Wang, Z.; Kong, W.; Feng, S.; Shen, B.; Mu, L., Integration of torrefaction and in-situ pelletization for biodried products derived from municipal organic wastes: The influences of temperature on fuel properties and combustion behaviours. *Fuel* **2022**, 313, 122845.
11. Sukiran, M.A.; Wan Daud, W.M.A.; Abnisa, F.; Nasrin, A.B.; Astimar, A.A.; Loh, S.K., Individual torrefaction parameter enhances characteristics of torrefied empty fruit bunches. *Biomass Convers Bior* **2021**, 11, (2), 461-472.
12. Nyakuma, B.B.; Oladokun, O.; Wong, S.L.; Abdullah, T.A.T., Torrefaction of oil palm empty fruit bunch pellets: product yield, distribution and fuel characterisation for enhanced energy recovery. *Biomass Convers Bior* **2021**.

13. Yu, Y.; Zhu, Z.; Wang, L.; Wang, G.; Bai, X., Effect of Torrefaction Treatment on Physical and Fuel Properties of Caragana (Caragana korshinskii) Pellets. *Bioenerg Res* **2021**.
14. Oh, K.C.; Kim, J.; Park, S.Y.; Kim, S.J.; Cho, L.H.; Lee, C.G.; Roh, J.; Kim, D.H., Development and validation of torrefaction optimization model applied element content prediction of biomass. *Energy* **2021**, 214, 119027.
15. Sun, Y.; Tong, S.; Li, X.; Wang, F.; Hu, Z.; Dacres, O.D.; Edreis, E.M.A.; Worasuwanarak, N.; Sun, M.; Liu, H.; Hu, H.; Luo, G.; Yao, H., Gas-pressurized torrefaction of biomass wastes: The optimization of pressurization condition and the pyrolysis of torrefied biomass. *Bioresource Technol* **2021**, 319, 124216.
16. Liao, L.; Zheng, J.; Zhang, Y.; Li, C.; Yuan, C., Impact of torrefaction on entrained-flow gasification of pine sawdust: An experimental investigation. *Fuel* **2021**, 289, 119919.
17. Lin, Y.; Zheng, N.; Hsu, C., Torrefaction of fruit peel waste to produce environmentally friendly biofuel. *J Clean Prod* **2021**, 284, 124676.
18. Silveira, E.A.; Luz, S.M.; Leão, R.M.; Rousset, P.; Caldeira-Pires, A., Numerical modeling and experimental assessment of sustainable woody biomass torrefaction via coupled TG-FTIR. *Biomass and Bioenergy* **2021**, 146, 105981.
19. Setkit, N.; Li, X.; Yao, H.; Worasuwanarak, N., Torrefaction behavior of hot-pressed pellets prepared from leucaena wood. *Bioresource Technol* **2021**, 321, 124502.
20. Feng, Z.; Yang, J.; Ni, L.; Gao, Q.; Liu, Z., The chemical and structural transformation of bamboo wastes during torrefaction process. *Environ Prog Sustain* **2021**, 40, (3).
21. Chen, C.; Ji, G.; Mu, L.; Zhang, Y.; Li, A., Comprehensive research on the solid, liquid, and gaseous products of rice husk and rice straw torrefaction. *Sustain Energ Fuels* **2021**, 5, (3), 687-697.
22. Fu, J.; Summers, S.; Turn, S.Q.; Kusch, W., Upgraded pongamia pod via torrefaction for the production of bioenergy. *Fuel* **2021**, 291, 120260.
23. Kongto, P.; Palamanit, A.; Chaiprapat, S.; Tippayawong, N., Enhancing the fuel properties of rubberwood biomass by moving bed torrefaction process for further applications. *Renew Energ* **2021**, 170, 703-713.
24. Cao, X.; Zhang, J.; Cen, K.; Chen, F.; Chen, D.; Li, Y., Investigation of the relevance between thermal degradation behavior and physicochemical property of cellulose under different torrefaction severities. *Biomass and Bioenergy* **2021**, 148, 106061.
25. Lin, Y.; Zheng, N., Torrefaction of fruit waste seed and shells for biofuel production with reduced CO<sub>2</sub> emission. *Energy* **2021**, 225, 120226.
26. Sukiran, M.A.; Wan Daud, W.M.A.; Abnisa, F.; Nasrin, A.B.; Abdul Aziz, A.; Loh, S.K., A comprehensive study on torrefaction of empty fruit bunches: Characterization of solid, liquid and gas products. *Energy* **2021**, 230, 120877.
27. Patidar, K.; Vashishtha, M., Impact of torrefaction conditions on the physicochemical properties of mustard crop residue. *Materials Today: Proceedings* **2021**, 44, 4072-4078.
28. Lee, B.; Sh, L.; Lee, D.; Jeon, C., Effect of torrefaction and ashless process on combustion and NO<sub>x</sub> emission behaviors of woody and herbaceous biomass. *Biomass and Bioenergy* **2021**, 151, 106133.
29. Carneiro-Junior, J.A.D.M.; de Oliveira, G.F.D.; Alves, C.T.; Andrade, H.M.C.; Beisl Vieira De Melo, S.A.B.V.; Torres, E.A., Valorization of Prosopis juliflora Woody Biomass in Northeast Brazilian through Dry Torrefaction. *Energies* **2021**, 14, (12), 3465.
30. Pedroso, D.T.; Machin, E.B.; Cabrera-Barjas, G.; Flores, M.; Urrea, H.G.; de Carvalho, F.S.; Santos, M.I.S.D.; Machín, A.B.; Canettieri, E.V.; Pérez, N.P.; Teixeira Lacava, P.; Ribeiro Dos Santos, L.;

- Andrade De Carvalho Júnior, J., Sugarcane Bagasse Torrefaction for Fluidized Bed Gasification. *Applied Sciences* **2021**, 11, (13), 6105.
31. Ullah, H.; Lun, L.; Riaz, L.; Naseem, F.; Shahab, A.; Rashid, A., Physicochemical characteristics and thermal degradation behavior of dry and wet torrefied orange peel obtained by dry/wet torrefaction. *Biomass Convers Bior* **2021**.
  32. Chen, C.; Qu, B.; Wang, W.; Wang, W.; Ji, G.; Li, A., Rice husk and rice straw torrefaction: Properties and pyrolysis kinetics of raw and torrefied biomass. *Environmental Technology & Innovation* **2021**, 24, 101872.
  33. Li, R.; Wu, C.; Zhu, L.; Hu, Z.; Xu, J.; Yang, Y.; Yang, F.; Ma, Z., Regulation of the elemental distribution in biomass by the torrefaction pretreatment using different atmospheres and its influence on the subsequent pyrolysis behaviors. *Fuel Process Technol* **2021**, 222, 106983.
  34. Lampropoulos, A.; Kaklidis, N.; Athanasiou, C.; Montes-Morán, M.A.; Arenillas, A.; Menéndez, J.A.; Binas, V.D.; Konsolakis, M.; Marnellos, G.E., Effect of Olive Kernel thermal treatment (torrefaction vs. slow pyrolysis) on the physicochemical characteristics and the CO<sub>2</sub> or H<sub>2</sub>O gasification performance of as-prepared biochars. *Int J Hydrogen Energ* **2021**, 46, (57), 29126-29141.
  35. Tsai, W.; Jiang, T.; Tang, M.; Chang, C.; Kuo, T., Enhancement of thermochemical properties on rice husk under a wide range of torrefaction conditions. *Biomass Convers Bior* **2021**.
  36. Ivanovski, M.; Petrovic, A.; Ban, I.; Goricanec, D.; Urbanc, D., Determination of the Kinetics and Thermodynamic Parameters of Lignocellulosic Biomass Subjected to the Torrefaction Process. *Materials* **2021**, 14, (24), 7877.
  37. Duranay, N.D.; Akkuş, G., Solid fuel production with torrefaction from vineyard pruning waste. *Biomass Convers Bior* **2021**, 11, (6), 2335-2346.
  38. Demey, H.; Rodriguez-Alonso, E.; Lacombe, E.; Grateau, M.; Jaricot, N.; Chatroux, A.; Thierry, S.; Marchand, M.; Melkior, T., Upscaling Severe Torrefaction of Agricultural Residues to Produce Sustainable Reducing Agents for Non-Ferrous Metallurgy. *Metals-Basel* **2021**, 11, (12), 1905.
  39. Khempila, J.; Kongto, P.; Meena, P., Comparative study of solid biofuels derived from sugarcane leaves with two different thermochemical conversion methods: wet and dry torrefaction. *Bioenerg Res* **2021**.
  40. Xiaojie Tiana, L.D.Y.W., Influence of torrefaction pretreatment on corncobs: A study on fundamental characteristics, thermal behavior, and kinetic. *Bioresource Technol* **2020**, (297).
  41. Hu, J.; Song, Y.; Liu, J.; Evrendilek, F.; Buyukada, M.; Yan, Y.; Li, L., Combustions of torrefaction-pretreated bamboo forest residues: Physicochemical properties, evolved gases, and kinetic mechanisms. *Bioresource Technol* **2020**, 304, 122960.
  42. Huang, J.; Qiao, Y.; Wang, Z.; Liu, H.; Wang, B.; Yu, Y., Valorization of Food Waste via Torrefaction: Effect of Food Waste Type on the Characteristics of Torrefaction Products. *Energ Fuel* **2020**, 34, (5), 6041-6051.
  43. Singh, S.; Chakraborty, J.P.; Mondal, M.K., Torrefaction of woody biomass (*Acacia nilotica*): Investigation of fuel and flow properties to study its suitability as a good quality solid fuel. *Renew Energ* **2020**, 153, 711-724.
  44. Manatura, K., Inert torrefaction of sugarcane bagasse to improve its fuel properties. *Case Studies in Thermal Engineering* **2020**, 19, 100623.
  45. Liu, X.; Yao, Z.; Zhao, L.; Song, J.; Jia, J., Torrefaction of Sorghum Straw Pellets in a Stationary Reactor with a Feeding Screw. *Energ Fuel* **2020**, 34, (5), 5997-6007.
  46. Singh, R.K.; Jena, K.; Chakraborty, J.P.; Sarkar, A., Energy and exergy analysis for torrefaction of

- pigeon pea stalk (cajanus cajan) and eucalyptus (eucalyptus tereticornis). *Int J Hydrogen Energ* **2020**, 45, (38), 18922-18936.
47. Liu, X.; Yao, Z.; Cong, H.; Zhao, L.; Huo, L.; Song, J.; School Of Mechanical Engineering And Automation, N.U.S.C.; Key Laboratory Of Energy Resource Utilization From Agriculture Residue Of Ministry Of Agriculture And Rural Affairs, A.O.A.P.; Institute Of Environment And Sustainable Development In Agriculture, C.A.O.A., Effects of operating conditions and pre-densification on the torrefaction products of sorghum straw. *Int J Agr Biol Eng* **2020**, 13, (4), 219-225.
  48. Kizuka, R.; Ishii, K.; Ochiai, S.; Sato, M.; Yamada, A.; Nishimiya, K., Improvement of Biomass Fuel Properties for Rice Straw Pellets Using Torrefaction and Mixing with Wood Chips. *Waste Biomass Valori* **2020**.
  49. Cen, K.; Zhang, J.; Chen, D.; Chen, F.; Zhang, Y.; Ma, H., Comparative study of the fuel quality and torrefaction performance of biomass and its molded pellets: effects of temperature and residence time. *Energy sources. Part A, Recovery, utilization, and environmental effects* **2020**, 1-10.
  50. Chen, D.; Chen, F.; Cen, K.; Cao, X.; Zhang, J.; Zhou, J., Upgrading rice husk via oxidative torrefaction: Characterization of solid, liquid, gaseous products and a comparison with non-oxidative torrefaction. *Fuel* **2020**, 275, 117936.
  51. Simonic, M.; Goricanec, D.; Urbanc, D., Impact of torrefaction on biomass properties depending on temperature and operation time. *Sci Total Environ* **2020**, 740, 140086.
  52. Mukhtar, H.; Feroze, N.; Munir, H.M.S.; Javed, F.; Kazmi, M., Torrefaction process optimization of agriwaste for energy densification. *Energy sources. Part A, Recovery, utilization, and environmental effects* **2020**, 42, (20), 2526-2544.
  53. Da Silva, J.C.G.; Pereira, J.L.C.; Andersen, S.L.F.; Moreira, R.D.F.P.; José, H.J., Torrefaction of ponkan peel waste in tubular fixed-bed reactor: In-depth bioenergetic evaluation of torrefaction products. *Energy* **2020**, 210, 118569.
  54. Mokrzycki, J.; Gazińska, M.; Fedyna, M.; Karcz, R.; Lorenc-Grabowska, E.; Rutkowski, P., Pyrolysis and torrefaction of waste wood chips and cone-like flowers derived from black alder (*Alnus glutinosa* L. Gaertn.) for sustainable solid fuel production. *Biomass and Bioenergy* **2020**, 143, 105842.
  55. Wang, L.; Riva, L.; Skreiberg, Ø.; Khalil, R.; Bartocci, P.; Yang, Q.; Yang, H.; Wang, X.; Chen, D.; Rudolfsson, M.; Nielsen, H.K., Effect of Torrefaction on Properties of Pellets Produced from Woody Biomass. *Energ Fuel* **2020**, 34, (12), 15343-15354.
  56. Kanwal, S.; Chaudhry, N.; Munir, S.; Sana, H., Effect of torrefaction conditions on the physicochemical characterization of agricultural waste (sugarcane bagasse). *Waste Manage* **2019**, 88, 280-290.
  57. Singh, R.K.; Sarkar, A.; Chakraborty, J.P., Effect of torrefaction on the physicochemical properties of pigeon pea stalk (*Cajanus cajan*) and estimation of kinetic parameters. *Renew Energ* **2019**, 138, 805-819.
  58. Chen, D.; Gao, A.; Ma, Z.; Fei, D.; Chang, Y.; Shen, C., In-depth study of rice husk torrefaction: Characterization of solid, liquid and gaseous products, oxygen migration and energy yield. *Bioresource Technol* **2018**, 253, 148-153.
  59. Aneta Magdziarz, M.W.R.S., Combustion process of torrefied wood biomass. *J Therm Anal Calorim* **2017**, 1339-1349.
  60. McNamee, P.; Adams, P.W.R.; McManus, M.C.; Dooley, B.; Darvell, L.I.; Williams, A.; Jones, J.M., An assessment of the torrefaction of North American pine and life cycle greenhouse gas emissions. *Energ Convers Manage* **2016**, 113, 177-188.

61. Toptas, A.; Yildirim, Y.; Duman, G.; Yanik, J., Combustion behavior of different kinds of torrefied biomass and their blends with lignite. *Bioresource Technol* **2015**, 177, 328-336.
62. Nam, H.; Capareda, S., Experimental investigation of torrefaction of two agricultural wastes of different composition using RSM (response surface methodology). *Energy* **2015**, 91, 507-516.
63. Chen, Y.; Yang, H.; Yang, Q.; Hao, H.; Zhu, B.; Chen, H., Torrefaction of agriculture straws and its application on biomass pyrolysis poly-generation. *Bioresource Technol* **2014**, 156, 70-77.
64. Lu, K.; Lee, W.; Chen, W.; Liu, S.; Lin, T., Torrefaction and low temperature carbonization of oil palm fiber and eucalyptus in nitrogen and air atmospheres. *Bioresource Technol* **2012**, 123, 98-105.
65. Bridgeman, T.G.; Jones, J.M.; Shield, I.; Williams, P.T., Torrefaction of reed canary grass, wheat straw and willow to enhance solid fuel qualities and combustion properties. *Fuel* **2008**, 87, (6), 844-856.
66. Xiaorui, L.; Longji, Y.; Xudong, Y., *Evolution of chemical functional groups during torrefaction of rice straw*. 2021; Vol. 320, p 124328.

Table S2. Parameter values and basic settings of the BPNN-GA model.

|      | Parameters             | Values                            |
|------|------------------------|-----------------------------------|
| BPNN | Structure              | One hidden layer back propagation |
|      | Hidden neurons         | 4-14                              |
|      | Learning ratio         | 0.01                              |
|      | Momentum factor        | 0.01                              |
|      | Number of data samples | 497                               |
|      | Ratio of training data | 0.8                               |
|      | Ratio of testing data  | 0.2                               |
| GA   | Population size        | 80                                |
|      | Chromosome length      | 13X+6                             |
|      | Maximum generation     | 300                               |
|      | Crossover fraction     | 0.8                               |
|      | Migration fraction     | 0.01                              |



Table S3. Pearson correlation coefficient between any two features

|      | MO       | VM       | ASH      | FC       | Temp     | Time     | FR       | O/C      | H/C      | HHV      | MY       | EY       |
|------|----------|----------|----------|----------|----------|----------|----------|----------|----------|----------|----------|----------|
| MO   | 1        | -0.03771 | -0.09897 | -0.37075 | -0.03035 | -0.04833 | 0.037311 | -0.20386 | -0.19213 | -0.03871 | 0.054822 | -0.03457 |
| VM   | -0.03771 | 1        | -0.34212 | -0.61335 | 0.03735  | -0.01406 | -0.32559 | 0.044149 | 0.148177 | -0.01071 | -0.01344 | 0.019636 |
| ASH  | -0.09897 | -0.34212 | 1        | 0.141089 | -0.0777  | -0.02876 | 0.192094 | 0.154517 | -0.04417 | -0.05151 | 0.164453 | 0.007463 |
| FC   | -0.37075 | -0.61335 | 0.141089 | 1        | 0.054781 | 0.122013 | 0.237876 | -0.05717 | -0.12488 | 0.055843 | -0.00095 | -0.01165 |
| Temp | -0.03035 | 0.03735  | -0.0777  | 0.054781 | 1        | 0.002868 | 0.03945  | -0.10698 | 0.023714 | -0.06832 | -0.04401 | 0.10832  |
| Time | -0.04833 | -0.01406 | -0.02876 | 0.122013 | 0.002868 | 1        | 0.147655 | -0.13014 | -0.2308  | 0.199383 | -0.12658 | 0.00709  |
| FR   | 0.037311 | -0.32559 | 0.192094 | 0.237876 | 0.03945  | 0.147655 | 1        | -0.22565 | -0.26535 | -0.05553 | -0.01796 | -0.06987 |
| O/C  | -0.20386 | 0.044149 | 0.154517 | -0.05717 | -0.10698 | -0.13014 | -0.22565 | 1        | 0.235059 | -0.01241 | 0.043467 | -0.02176 |
| H/C  | -0.19213 | 0.148177 | -0.04417 | -0.12488 | 0.023714 | -0.2308  | -0.26535 | 0.235059 | 1        | 0.029617 | -0.04189 | 0.096107 |
| HHV  | -0.03871 | -0.01071 | -0.05151 | 0.055843 | -0.06832 | 0.199383 | -0.05553 | -0.01241 | 0.029617 | 1        | -0.09244 | -0.13891 |
| MY   | 0.054822 | -0.01344 | 0.164453 | -0.00095 | -0.04401 | -0.12658 | -0.01796 | 0.043467 | -0.04189 | -0.09244 | 1        | 0.010408 |
| EY   | -0.03457 | 0.019636 | 0.007463 | -0.01165 | 0.10832  | 0.00709  | -0.06987 | -0.02176 | 0.096107 | -0.13891 | 0.010408 | 1        |

Table S4. R<sup>2</sup> and RMSE results of the training and testing set using BPNN model

|                           | FR     | H/C    | O/C    | HHV    | MY     | EY     |
|---------------------------|--------|--------|--------|--------|--------|--------|
| R <sup>2</sup> (training) | 0.8266 | 0.7555 | 0.7783 | 0.8646 | 0.8111 | 0.7201 |
| RMSE (training)           | 0.161  | 0.0155 | 0.1075 | 1.6033 | 0.0794 | 0.0771 |
| R <sup>2</sup> (testing)  | 0.4222 | 0.6667 | 0.7203 | 0.8145 | 0.7146 | 0.6487 |
| RMSE (testing)            | 0.1782 | 0.0127 | 0.2444 | 1.8196 | 0.1467 | 0.0926 |

Figure S1. Comparison of BPNN predicted and experimental data of training set.

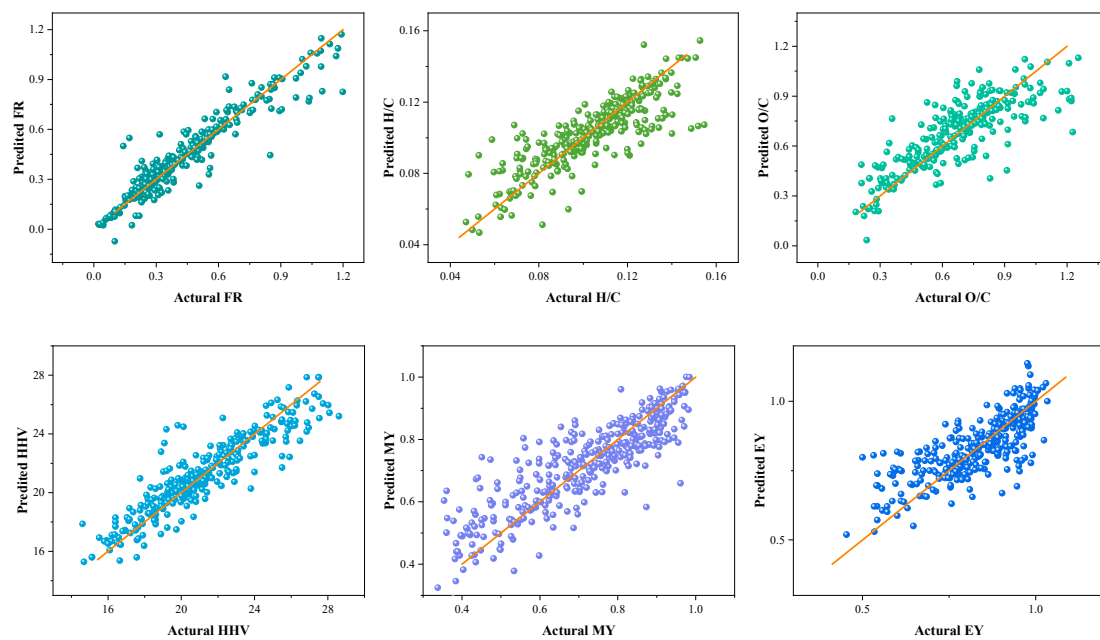

Figure S2. Comparison of BPNN predicted and experimental data of testing set.

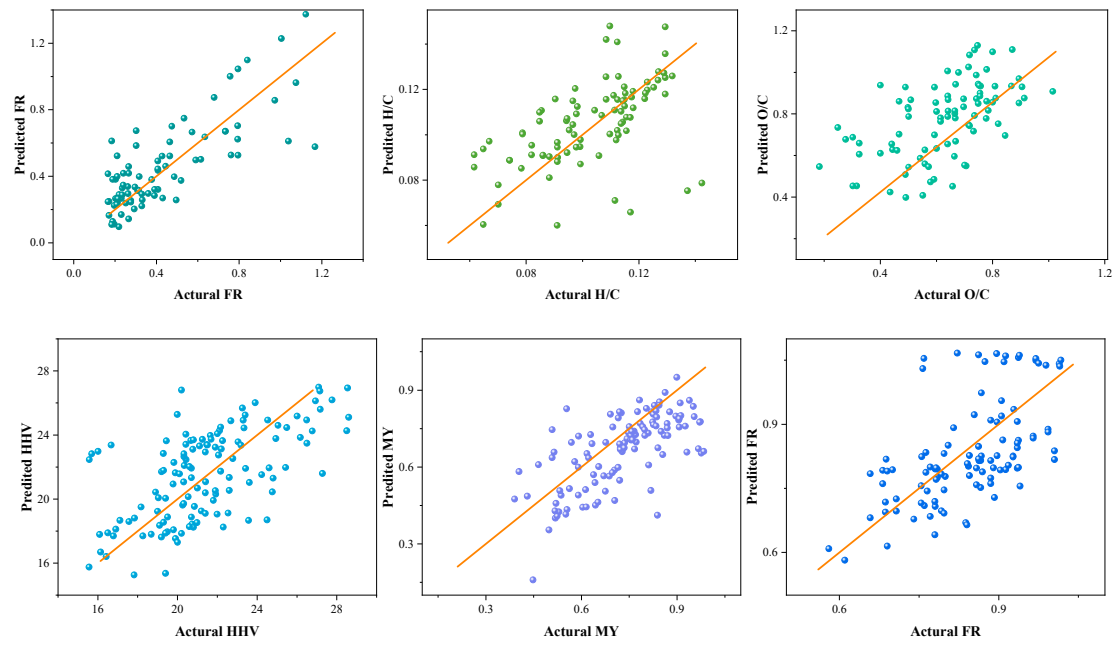

Supplement: s1 [file s1]
